# Supplementary material for: Association of Potentially Modifiable Diabetes Care Factors With Glycemic Control in Patients With Insulin-Treated Type 2 Diabetes
Source: PubMed Central journal article supplement — JAMA Netw Open. 2020 Jan 22;3(1):e1919645. doi: 10.1001/jamanetworkopen.2019.19645 (PMC6991273; doi:10.1001/jamanetworkopen.2019.19645), 2020-01-22
Supplement: jamanetwopen-3-e1919645-s001.pdf [file jamanetwopen-3-e1919645-s001.pdf]

## Supplementary Online Content

Lauffenburger JC, Lewey J, Jan S, Lee J, Ghazinouri R, Choudhry NK. Association of potentially modifiable diabetes care factors with glycemic control in patients with insulin-treated type 2 diabetes. *JAMA Netw Open*. 2020;3(1):e1919645.  
doi:10.1001/jamanetworkopen.2019.19645

**eTable 1.** Measurement of Factors

**eFigure.** Cohort Flow Diagram

**eTable 2.** Pairwise Correlation Coefficients Between Regressors (P-Values)

**eTable 3.** Sensitivity Analysis of Association of Factors With Adequate Glycemic Control: Reduced Model

**eTable 4.** Association of Factors With Adequate Glycemic Control by Sex Subgroup

This supplementary material has been provided by the authors to give readers additional information about their work.

**eTable 1.** Measurement of factors

| <b>Factors</b>                           | <b>Measurement</b>                                                                                                                                                                                     |
|------------------------------------------|--------------------------------------------------------------------------------------------------------------------------------------------------------------------------------------------------------|
| Age                                      | Enrollment files                                                                                                                                                                                       |
| Gender                                   | Enrollment files                                                                                                                                                                                       |
| COPD/Asthma                              | ICD-9 codes: 490.xx, 491.xx, 492.xx, 496.xx; 493.xx; ICD-10 codes: J45, J40, J41, J42, J43                                                                                                             |
| CHF                                      | ICD-9 codes: 428.xx, 398.91, 402.01, 402.11, 402.91, 404.01, 404.11, 404.91, 404.03, 404.13, 404.93; ICD-10 codes: I50, I11.0                                                                          |
| Depression                               | ICD-9 codes: 311.xx, 296.2, 296.3, 300.4, 301.12, 309.1; ICD-10: F33, F32                                                                                                                              |
| Hypertension                             | ICD-9 codes: 401.xx-405.xx, 437.2; ICD-10 codes: I10, I11, I12, I13, I15, I16, I674, N262                                                                                                              |
| Hyperlipidemia                           | ICD-9: 272; ICD-10: E78, E76, E88                                                                                                                                                                      |
| Liver disease                            | ICD-9 codes: 570.xx-573.xx, 456.00–456.21; ICD-10 codes: K76, K70, K71, K72, K73, K74                                                                                                                  |
| Osteoporosis                             | ICD-9: 733; ICD-10: M81                                                                                                                                                                                |
| Alzheimer's/Dementia                     | ICD-9: 290, 294.1, 294.9, 330, 331; ICD-10: E75, F01, F02, F03, F05, G13, G30, G31, G91                                                                                                                |
| Hypoglycemia                             | ICD-9: 251.2; ICD-10: E16.2, E11.649, E16.1, E16.0                                                                                                                                                     |
| Diabetic ketoacidosis                    | ICD-9 codes: 250.1x; ICD-10 codes: E10.10                                                                                                                                                              |
| Kidney disease                           | ICD-9 codes: 582.xx, 583.xx, 585.xx, 586.xx, 587.xx, 250.4, 250.40, 250.41, 250.42, 250.43, 403.xx, 404.xx, 585.6; ICD-10 codes: N18, N19, N17, E09, E10, E1, E13                                      |
| Macrovascular disease                    | ICD-9 codes: 410.xx-414.xx, 429.2, V45.81, 433.x1, 434.x1, 435.x, 436, 437.1x, 437.9x, 438.x; ICD-10 codes: I60, I61, I63, I64; E12.5, E13.5, E14.5, I20-I25                                           |
| Microvascular disease                    | ICD-9 codes: 362.01-362.07, 583.81, 250.6, 357.2; ICD-10: E10.2, E11.2, E12.2, E13.2, E14.2, E10.3, E11.3, E12.3, E13.3, E14.3, E10.4, E11.4, E12.4, E13.4, E14.4                                      |
| Use of insulin listed on formulary       | Pharmacy claims indicator for the basal insulin                                                                                                                                                        |
| Insulin copayment                        | Pharmacy claims for first initiated basal insulin in baseline period                                                                                                                                   |
| Insulin persistence                      | Pharmacy claims: Gap between insulin fills >60 days                                                                                                                                                    |
| Mail order use                           | Pharmacy claims indicator                                                                                                                                                                              |
| Rapid-acting insulin                     | Pharmacy claims: fill for insulin lispro, insulin aspart, or insulin glulisine                                                                                                                         |
| Oral medications                         | Counting the number of unique medications in pharmacy claims: sulfonylurea, meglitinide, biguanide, thiazolidinedione, alpha-glucosidase inhibitor, SGLT2 inhibitors, DPP4-inhibitor, or GLP1 agonists |
| Type of basal insulin                    | Pharmacy claims for first initiated insulin in baseline period                                                                                                                                         |
| No. of glucose self-testing supply fills | Pharmacy claims: fills for test strips or lancets                                                                                                                                                      |
| Endocrinologist use                      | Office visit with an endocrinologist defined by NPI                                                                                                                                                    |
| No. of primary care office visits        | No. of outpatient office visits with "family medicine" or "primary care" defined by NPI                                                                                                                |

Abbreviations: ICD-9, International Classification of Disease 9<sup>th</sup> edition (before October 1, 2015); ICD-10, International Classification of Disease 10<sup>th</sup> edition (beginning October 1, 2016); COPD, Chronic obstructive

pulmonary disease; CHF, Congestive Heart Failure; SGLT2, Sodium-glucose co-transporter 2; DPP4, dipeptidyl peptidase 4; GLP1, glucose-dependent insulinotropic peptide; NPI, National Provider Identifier; CPT, Current Procedural Terminology

**eFigure.** Cohort flow diagram

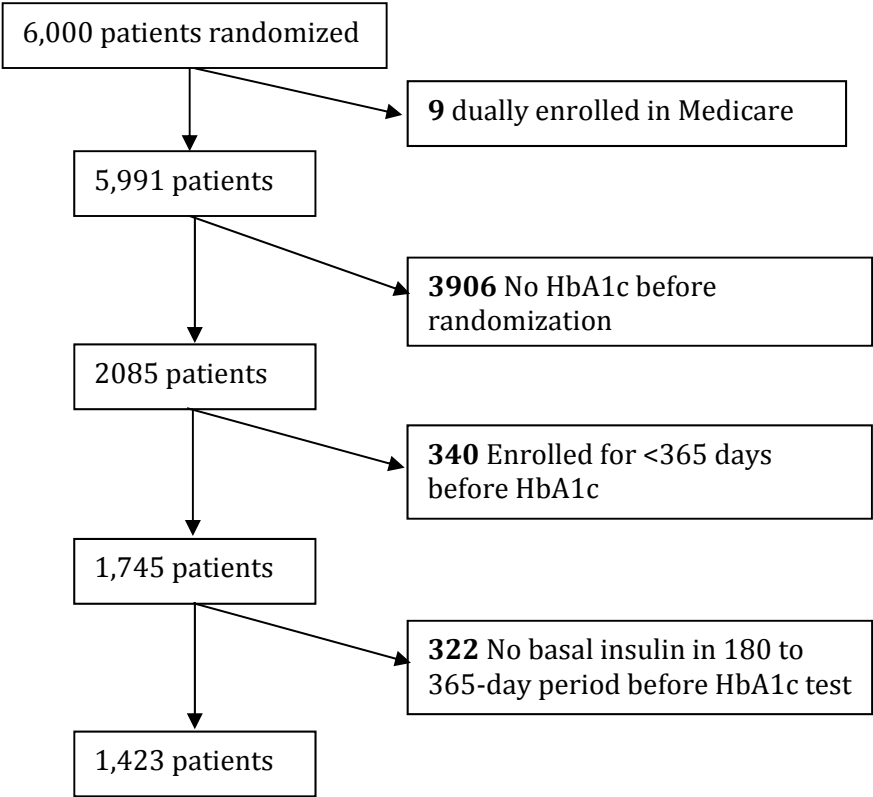

**eTable 2.** Pairwise correlation coefficients between regressors (p-values)

|                          | Female                | Age                   | CHF                  | COPD/Asthma          | Depression           | Hyperlipidemia       | Hypertension         | Liver disease        | Osteoporosis    | Alzheimer's/dementia | Hypoglycemia    | Ketoacidosis     | Kidney disease       | Macrovascular disease | Microvascular disease | Rapid-acting insulin  | No. diabetes drugs    | Type of basal insulin | Persistence     | No. supply fills     | Endocrinologist | PCP office visits     | Formulary use        | Insulin copay   | Mail order use |
|--------------------------|-----------------------|-----------------------|----------------------|----------------------|----------------------|----------------------|----------------------|----------------------|-----------------|----------------------|-----------------|------------------|----------------------|-----------------------|-----------------------|-----------------------|-----------------------|-----------------------|-----------------|----------------------|-----------------|-----------------------|----------------------|-----------------|----------------|
| Female                   | 1.00                  |                       |                      |                      |                      |                      |                      |                      |                 |                      |                 |                  |                      |                       |                       |                       |                       |                       |                 |                      |                 |                       |                      |                 |                |
| Age                      | -0.01<br>(0.66)       | 1.00                  |                      |                      |                      |                      |                      |                      |                 |                      |                 |                  |                      |                       |                       |                       |                       |                       |                 |                      |                 |                       |                      |                 |                |
| CHF                      | -0.07<br>(0.01)       | 0.10<br>(0.00)        | 1.00                 |                      |                      |                      |                      |                      |                 |                      |                 |                  |                      |                       |                       |                       |                       |                       |                 |                      |                 |                       |                      |                 |                |
| COPD/Asthma              | 0.07<br>(0.01)        | 0.02<br>(0.36)        | 0.09<br>(0.004)      | 1.00                 |                      |                      |                      |                      |                 |                      |                 |                  |                      |                       |                       |                       |                       |                       |                 |                      |                 |                       |                      |                 |                |
| Depression               | 0.12<br>( $<0.001$ )  | -0.01<br>(0.68)       | 0.01<br>(0.83)       | 0.05<br>(0.06)       | 1.00                 |                      |                      |                      |                 |                      |                 |                  |                      |                       |                       |                       |                       |                       |                 |                      |                 |                       |                      |                 |                |
| Hyperlipidemia           | -0.08<br>(0.002)      | 0.12<br>( $<0.001$ )  | 0.07<br>(0.001)      | 0.06<br>(0.03)       | 0.06<br>(0.02)       | 1.00                 |                      |                      |                 |                      |                 |                  |                      |                       |                       |                       |                       |                       |                 |                      |                 |                       |                      |                 |                |
| Hypertension             | -0.02<br>(0.35)       | -0.02<br>(0.35)       | 0.13<br>( $<0.001$ ) | 0.10<br>( $<0.001$ ) | 0.04<br>(0.15)       | 0.32<br>( $<0.001$ ) | 1.00                 |                      |                 |                      |                 |                  |                      |                       |                       |                       |                       |                       |                 |                      |                 |                       |                      |                 |                |
| Liver disease            | 0.07<br>(0.01)        | 0.07<br>(0.01)        | -0.01<br>(0.64)      | 0.03<br>(0.19)       | 0.10<br>( $<0.001$ ) | 0.07<br>(0.97)       | 0.06<br>(0.02)       | 1.00                 |                 |                      |                 |                  |                      |                       |                       |                       |                       |                       |                 |                      |                 |                       |                      |                 |                |
| Osteoporosis             | 0.16<br>( $<0.001$ )  | 0.16<br>( $<0.001$ )  | 0.05<br>(0.05)       | 0.08<br>(0.002)      | 0.10<br>( $<0.001$ ) | 0.07<br>(0.01)       | 0.05<br>(0.05)       | 0.01<br>(0.65)       | 1.00            |                      |                 |                  |                      |                       |                       |                       |                       |                       |                 |                      |                 |                       |                      |                 |                |
| Alzheimer's/dementia     | 0.03<br>(0.28)        | 0.03<br>(0.28)        | 0.04<br>(0.17)       | 0.14<br>( $<0.001$ ) | 0.09<br>( $<0.001$ ) | 0.05<br>(0.09)       | 0.04<br>(0.15)       | 0.14<br>( $<0.001$ ) | 0.04<br>(0.18)  | 1.00                 |                 |                  |                      |                       |                       |                       |                       |                       |                 |                      |                 |                       |                      |                 |                |
| Hypoglycemia             | -0.02<br>(0.51)       | -0.04<br>(0.11)       | 0.02<br>(0.43)       | 0.05<br>(0.86)       | 0.09<br>( $<0.001$ ) | 0.05<br>(0.09)       | 0.01<br>(0.68)       | 0.00<br>(0.86)       | 0.04<br>(0.17)  | 0.02<br>(0.52)       | 1.00            |                  |                      |                       |                       |                       |                       |                       |                 |                      |                 |                       |                      |                 |                |
| Diabetic ketoacidosis    | 0.00<br>(0.97)        | -0.13<br>( $<0.001$ ) | 0.03<br>(0.26)       | -0.03<br>(0.30)      | 0.08<br>(0.003)      | -0.01<br>(0.61)      | 0.01<br>(0.80)       | 0.04<br>(0.13)       | 0.03<br>(0.27)  | 0.03<br>(0.22)       | 0.02<br>(0.36)  | 1.00             |                      |                       |                       |                       |                       |                       |                 |                      |                 |                       |                      |                 |                |
| Kidney disease           | -0.02<br>(0.51)       | 0.05<br>(0.05)        | 0.09<br>( $<0.001$ ) | 0.06<br>(0.02)       | 0.05<br>(0.05)       | 0.13<br>( $<0.001$ ) | 0.17<br>( $<0.001$ ) | 0.04<br>(0.13)       | 0.07<br>(0.006) | 0.03<br>(0.32)       | 0.05<br>(0.07)  | 0.05<br>(0.07)   | 1.00                 |                       |                       |                       |                       |                       |                 |                      |                 |                       |                      |                 |                |
| Macrovascular disease    | -0.10<br>( $<0.001$ ) | 0.19<br>( $<0.001$ )  | 0.31<br>( $<0.001$ ) | 0.13<br>( $<0.001$ ) | 0.05<br>(0.04)       | 0.18<br>( $<0.001$ ) | 0.25<br>( $<0.001$ ) | 0.03<br>(0.22)       | 0.01<br>(0.86)  | 0.12<br>( $<0.001$ ) | 0.03<br>(0.25)  | 0.02<br>(0.44)   | 0.02<br>( $<0.001$ ) | 1.00                  |                       |                       |                       |                       |                 |                      |                 |                       |                      |                 |                |
| Microvascular disease    | -0.05<br>(0.09)       | 0.12<br>( $<0.001$ )  | 0.08<br>(0.002)      | 0.06<br>(0.04)       | 0.01<br>(0.61)       | 0.07<br>(0.009)      | 0.13<br>( $<0.001$ ) | 0.02<br>(0.53)       | 0.08<br>(0.002) | 0.03<br>(0.25)       | 0.04<br>(0.11)  | 0.02<br>(0.40)   | 0.16<br>( $<0.001$ ) | 0.13<br>( $<0.001$ )  | 1.00                  |                       |                       |                       |                 |                      |                 |                       |                      |                 |                |
| Rapid-acting insulin use | 0.003<br>(0.90)       | -0.11<br>( $<0.001$ ) | 0.02<br>(0.39)       | 0.06<br>(0.03)       | 0.02<br>(0.45)       | -0.01<br>(0.72)      | -0.07<br>(0.01)      | 0.00<br>(0.73)       | 0.04<br>(0.10)  | 0.01<br>(0.70)       | 0.08<br>(0.004) | 0.07<br>(0.01)   | 0.14<br>( $<0.001$ ) | 0.08<br>(0.001)       | 0.07<br>(0.006)       | 1.00                  |                       |                       |                 |                      |                 |                       |                      |                 |                |
| No. of diabetes drugs    | -0.02<br>(0.47)       | 0.12<br>( $<0.001$ )  | -0.07<br>(0.006)     | -0.04<br>(0.12)      | 0.01<br>(0.65)       | 0.09<br>( $<0.001$ ) | -0.07<br>(0.01)      | 0.04<br>(0.09)       | 0.04<br>(0.10)  | -0.03<br>(0.23)      | -0.06<br>(0.02) | -0.03<br>(0.20)  | 0.03<br>(0.27)       | -0.03<br>(0.20)       | -0.07<br>(0.008)      | -0.37<br>( $<0.001$ ) | 1.00                  |                       |                 |                      |                 |                       |                      |                 |                |
| Basal insulin            |                       |                       |                      |                      |                      |                      |                      |                      |                 |                      |                 |                  |                      |                       |                       |                       |                       | 1.00                  |                 |                      |                 |                       |                      |                 |                |
| <i>Glargine 100u/ml</i>  | -0.01<br>(0.69)       | 0.03<br>(0.20)        | -0.01<br>(0.81)      | -0.02<br>(0.36)      | 0.03<br>(0.34)       | 0.04<br>(0.17)       | 0.03<br>(0.28)       | 0.01<br>(0.57)       | -0.03<br>(0.28) | 0.02<br>(0.40)       | 0.00<br>(0.89)  | -0.05<br>(0.08)  | 0.00<br>(0.86)       | 0.00<br>(0.90)        | -0.03<br>(0.34)       | -0.13<br>( $<0.001$ ) | 0.00<br>(0.96)        | 1.00                  | 0.00<br>(0.98)  | 0.00<br>(0.98)       | -0.05<br>(0.13) | -0.08<br>(0.002)      | 0.34<br>( $<0.001$ ) | -0.03<br>(0.25) | 0.00<br>(0.85) |
| <i>Detemir</i>           | 0.01<br>(0.66)        | 0.02<br>(0.49)        | 0.01<br>(0.84)       | 0.04<br>(0.10)       | -0.05<br>(0.09)      | 0.00<br>(0.97)       | 0.01<br>(0.67)       | 0.02<br>(0.44)       | -0.01<br>(0.70) | -0.04<br>(0.15)      | -0.02<br>(0.46) | 0.01<br>(0.70)   | -0.03<br>(0.22)      | -0.02<br>(0.46)       | 0.01<br>(0.72)        | -0.01<br>(0.64)       | 0.13<br>( $<0.001$ )  | 0.00<br>(0.79)        | -0.03<br>(0.28) | 0.00<br>(0.91)       | 0.07<br>(0.01)  | 0.21<br>( $<0.001$ )  | -0.06<br>(0.02)      | 0.00<br>(0.99)  |                |
| <i>NPH</i>               | 0.03<br>(0.28)        | -0.01<br>(0.82)       | -0.02<br>(0.39)      | -0.03<br>(0.20)      | 0.02<br>(0.49)       | -0.03<br>(0.23)      | -0.03<br>(0.25)      | -0.04<br>(0.10)      | 0.04<br>(0.17)  | 0.04<br>(0.10)       | 0.01<br>(0.65)  | 0.01<br>(0.58)   | -0.02<br>(0.50)      | 0.04<br>(0.68)        | 0.04<br>(0.13)        | -0.07<br>(0.01)       | -0.12<br>( $<0.001$ ) | 0.02<br>(0.51)        | 0.01<br>(0.82)  | -0.03<br>(0.31)      | 0.02<br>(0.40)  | -0.22<br>( $<0.001$ ) | 0.01<br>(0.58)       | 0.02<br>(0.43)  |                |
| <i>Lispro protamine</i>  | -0.02<br>(0.49)       | -0.09<br>(0.00)       | 0.01<br>(0.68)       | 0.01<br>(0.66)       | 0.01<br>(0.84)       | -0.04<br>(0.18)      | -0.07<br>(0.01)      | -0.02<br>(0.37)      | 0.04<br>(0.10)  | 0.00<br>(0.86)       | 0.03<br>(0.29)  | 0.05<br>(0.07)   | 0.05<br>(0.08)       | 0.00<br>(0.91)        | -0.03<br>(0.22)       | 0.26<br>( $<0.001$ )  | -0.12<br>( $<0.001$ ) | 0.00<br>(0.90)        | 0.05<br>(0.09)  | 0.04<br>(0.10)       | 0.03<br>(0.31)  | -0.82<br>( $<0.001$ ) | 0.15<br>( $<0.001$ ) | 0.00<br>(0.87)  |                |
| <i>Glargine 300u/ml</i>  | -0.01<br>(0.75)       | 0.03<br>(0.20)        | 0.02<br>(0.44)       | -0.03<br>(0.24)      | 0.02<br>(0.38)       | -0.02<br>(0.53)      | 0.05<br>(0.05)       | 0.01<br>(0.71)       | 0.00<br>(0.85)  | -0.01<br>(0.63)      | 0.01<br>(0.81)  | 0.02<br>(0.42)   | 0.03<br>(0.27)       | 0.03<br>(0.21)        | 0.07<br>(0.008)       | 0.11<br>( $<0.001$ )  | -0.04<br>(0.12)       | 0.00<br>(0.98)        | 0.00<br>(0.85)  | 0.10<br>( $<0.001$ ) | 0.00<br>(0.77)  | -0.01<br>(0.71)       | 0.00<br>(0.85)       | -0.05<br>(0.08) |                |
| Insulin persistence      | -0.03<br>(0.20)       | 0.03<br>(0.34)        | 0.01<br>(0.89)       | -0.01<br>(0.69)      | -0.07<br>(0.01)      | 0.02<br>(0.47)       | -0.02<br>(0.45)      | -0.03<br>(0.23)      | 0.01<br>(0.63)  | -0.02<br>(0.52)      | -0.03<br>(0.33) | -0.09<br>(0.001) | -0.03<br>(0.29)      | 0.00<br>(0.86)        | 0.07<br>(0.01)        | 0.00<br>(0.96)        | -0.02<br>(0.40)       | 1.00                  |                 |                      |                 |                       |                      |                 |                |
| No. testing supply fills | -0.01<br>(0.76)       | 0.01<br>(0.71)        | 0.01<br>(0.64)       | -0.01<br>(0.65)      | 0.02<br>(0.41)       | 0.02<br>(0.46)       | 0.00<br>(0.92)       | -0.02<br>(0.54)      | 0.00<br>(0.97)  | 0.01<br>(0.77)       | 0.02<br>(0.48)  | 0.02<br>(0.49)   | 0.09<br>(0.001)      | 0.05<br>(0.07)        | 0.03<br>(0.33)        | 0.16<br>( $<0.001$ )  | -0.08<br>(0.003)      |                       | 1.00            |                      |                 |                       |                      |                 |                |

|                             |                 |                      |                      |                      |                      |                      |                      |                      |                      |                 |                 |                 |                      |                 |                      |                       |                      |  |                 |                       |                       |                 |                       |                 |      |
|-----------------------------|-----------------|----------------------|----------------------|----------------------|----------------------|----------------------|----------------------|----------------------|----------------------|-----------------|-----------------|-----------------|----------------------|-----------------|----------------------|-----------------------|----------------------|--|-----------------|-----------------------|-----------------------|-----------------|-----------------------|-----------------|------|
| Endocrinologist use         | 0.01<br>(0.73)  | -0.08<br>(0.003)     | -0.03<br>(0.19)      | 0.05<br>(0.08)       | 0.09<br>( $<0.001$ ) | 0.10<br>( $<0.001$ ) | 0.02<br>(0.37)       | 0.03<br>(0.23)       | 0.04<br>(0.16)       | 0.06<br>(0.03)  | 0.09<br>(0.001) | 0.05<br>(0.06)  | 0.33<br>( $<0.001$ ) | 0.06<br>(0.03)  | 0.13<br>( $<0.001$ ) | 0.25<br>( $<0.001$ )  | 0.02<br>(0.41)       |  | -0.01<br>(0.70) | 0.09<br>( $<0.001$ )  | 1.00                  |                 |                       |                 |      |
| Primary care office visits  | 0.05<br>(0.04)  | 0.10<br>( $<0.001$ ) | 0.13<br>( $<0.001$ ) | 0.12<br>( $<0.001$ ) | 0.10<br>( $<0.001$ ) | 0.16<br>( $<0.001$ ) | 0.17<br>( $<0.001$ ) | 0.10<br>( $<0.001$ ) | 0.10<br>( $<0.001$ ) | 0.05<br>(0.08)  | 0.07<br>(0.005) | 0.07<br>(0.01)  | 0.08<br>(0.003)      | 0.09<br>(0.001) | 0.06<br>(0.03)       | 0.02<br>(0.50)        | 0.003<br>(0.90)      |  | 0.02<br>(0.56)  | 0.05<br>(0.05)        | -0.10<br>( $<0.001$ ) | 1.00            |                       |                 |      |
| Insulin listed on formulary | -0.00<br>(0.88) | 0.09<br>( $<0.001$ ) | 0.02<br>(0.55)       | 0.01<br>(0.89)       | -0.02<br>(0.43)      | 0.04<br>(0.09)       | 0.08<br>(0.002)      | 0.03<br>(0.26)       | -0.06<br>(0.02)      | -0.01<br>(0.79) | -0.02<br>(0.56) | -0.06<br>(0.03) | -0.05<br>(0.08)      | -0.02<br>(0.46) | 0.02<br>(0.56)       | -0.24<br>( $<0.001$ ) | 0.13<br>( $<0.001$ ) |  | -0.01<br>(0.68) | -0.05<br>(0.04)       | -0.05<br>(0.07)       | -0.05<br>(0.08) | 1.00                  |                 |      |
| Insulin copayment           | -0.01<br>(0.78) | -0.03<br>(0.26)      | -0.04<br>(0.17)      | -0.01<br>(0.63)      | -0.01<br>(0.90)      | -0.04<br>(0.17)      | -0.05<br>(0.09)      | -0.01<br>(0.60)      | 0.01<br>(0.75)       | -0.05<br>(0.07) | 0.00<br>(0.93)  | -0.01<br>(0.84) | 0.00<br>(0.92)       | -0.04<br>(0.09) | -0.02<br>(0.48)      | 0.02<br>(0.48)        | 0.01<br>(0.59)       |  | 0.00<br>(0.92)  | -0.11<br>( $<0.001$ ) | 0.03<br>(0.25)        | -0.03<br>(0.20) | -0.14<br>( $<0.001$ ) | 1.00            |      |
| Use of mail order           | -0.07<br>(0.01) | 0.09<br>( $<0.001$ ) | -0.01<br>(0.58)      | -0.01<br>(0.91)      | 0.00<br>(0.96)       | -0.04<br>(0.10)      | -0.07<br>(0.01)      | -0.02<br>(0.45)      | 0.01<br>(0.78)       | 0.07<br>(0.007) | -0.04<br>(0.16) | -0.05<br>(0.08) | -0.01<br>(0.63)      | -0.02<br>(0.43) | -0.02<br>(0.53)      | 0.05<br>(0.06)        | 0.00<br>(0.89)       |  | -0.04<br>(0.10) | -0.08<br>(0.005)      | -0.01<br>(0.69)       | -0.05<br>(0.04) | -0.01<br>(0.63)       | 0.08<br>(0.003) | 1.00 |

Abbreviations: CHF, Congestive Heart Failure; COPD, Chronic obstructive pulmonary disease; NPH, insulin isophane; PCP, Primary Care Provider

**eTable 3.** Association of factors with adequate glycemic control: Reduced model

| Characteristic (Ref: No)                                   | Adjusted Relative Risk (95% CI) |
|------------------------------------------------------------|---------------------------------|
| <b>Non-modifiable patient factors</b>                      |                                 |
| Age*                                                       | 1.01 (1.00-1.02)                |
| <b>Diabetes care delivery and patient behavior factors</b> |                                 |
| <i>Drug therapy</i>                                        |                                 |
| Use of adjunct rapid acting insulin                        | 0.89 (0.73-1.01)                |
| <i>Patient behavior</i>                                    |                                 |
| Insulin persistence                                        | 1.17 (0.96-1.42)                |
| No. glucose self-testing fills*                            | 1.01 (1.00-1.02)                |
| <i>Model of care and insurance structure</i>               |                                 |
| Endocrinologist use                                        | 1.35 (1.16-1.58)                |
| Use of mail order                                          | 1.25 (1.04-1.49)                |

\*Per 1-unit increase

Abbreviations: Ref, Referent; CI, Confidence Interval

**eTable 4.** Association of factors with adequate glycemic control by sex subgroup

| Factor (Ref: No)                                   | Men<br>Adjusted Relative Risk (95% CI) | Women<br>Adjusted Relative Risk (95% CI) | Age <66 years<br>Adjusted Relative Risk (95% CI) | Age ≥66 years<br>Adjusted Relative Risk (95% CI) |
|----------------------------------------------------|----------------------------------------|------------------------------------------|--------------------------------------------------|--------------------------------------------------|
| <b>Non-modifiable patient</b>                      |                                        |                                          |                                                  |                                                  |
| <i>Demographic</i>                                 |                                        |                                          |                                                  |                                                  |
| Age* (for stratification by sex)                   | 1.01 (1.00-1.03)                       | 1.00 (0.99-1.02)                         | -                                                | -                                                |
| Female (for stratification by age)                 | -                                      | -                                        | 0.98 (0.72-1.31)                                 | 0.87 (0.71-1.05)                                 |
| <i>Clinical comorbidities</i>                      |                                        |                                          |                                                  |                                                  |
| Congestive heart failure                           | 0.88 (0.57-1.37)                       | 1.23 (0.62-2.44)                         | 0.54 (0.17-1.75)                                 | 1.07 (0.72-1.57)                                 |
| COPD/Asthma                                        | 1.14 (0.85-1.54)                       | 1.03 (0.72-1.48)                         | 1.32 (0.87-2.00)                                 | 0.96 (0.73-1.26)                                 |
| Depression                                         | 0.84 (0.54-1.31)                       | 1.09 (0.74-1.61)                         | 0.84 (0.50-1.40)                                 | 0.95 (0.67-1.34)                                 |
| Hyperlipidemia                                     | 0.97 (0.76-1.25)                       | 0.99 (0.73-1.32)                         | 1.04 (0.75-1.44)                                 | 0.95 (0.75-1.19)                                 |
| Hypertension                                       | 1.15 (0.88-1.51)                       | 0.92 (0.65-1.28)                         | 0.95 (0.69-1.33)                                 | 1.13 (0.86-1.50)                                 |
| Liver disease                                      | 1.03 (0.67-1.60)                       | 0.92 (0.58-1.47)                         | 1.00 (0.56-1.81)                                 | 0.97 (0.67-1.41)                                 |
| Osteoporosis                                       | 1.13 (0.63-2.03)                       | 1.08 (0.72-1.62)                         | 1.19 (0.54-2.64)                                 | 1.09 (0.76-1.58)                                 |
| Alzheimer's/dementia                               | 1.39 (0.62-3.11)                       | 1.48 (0.57-3.86)                         | 1.82 (0.52-6.36)                                 | 1.43 (0.71-2.88)                                 |
| <i>Disease progression/control</i>                 |                                        |                                          |                                                  |                                                  |
| Hypoglycemia                                       | 0.77 (0.44-1.36)                       | 1.29 (0.67-2.49)                         | 0.86 (0.43-1.74)                                 | 0.93 (0.54-1.59)                                 |
| Diabetic ketoacidosis                              | 0.73 (0.32-1.67)                       | 1.32 (0.56-3.08)                         | 0.69 (0.31-1.54)                                 | 0.95 (0.39-2.32)                                 |
| Kidney disease                                     | 0.89 (0.71-1.10)                       | 1.10 (0.83-1.46)                         | 1.02 (0.74-1.40)                                 | 0.91 (0.74-1.12)                                 |
| Macrovascular disease                              | 0.90 (0.70-1.16)                       | 0.95 (0.65-1.38)                         | 0.89 (0.56-1.41)                                 | 0.94 (0.74-1.18)                                 |
| Microvascular disease                              | 0.94 (0.76-1.16)                       | 0.94 (0.72-1.24)                         | 1.08 (0.78-1.50)                                 | 0.93 (0.77-1.13)                                 |
| <b>Diabetes care delivery and patient behavior</b> |                                        |                                          |                                                  |                                                  |
| <i>Drug therapy</i>                                |                                        |                                          |                                                  |                                                  |
| Adjunct rapid acting insulin                       | 0.96 (0.76-1.16)                       | 0.74 (0.55-0.99)                         | 0.84 (0.60-1.18)                                 | 0.87 (0.70-1.08)                                 |
| No. unique oral diabetes drugs*                    | 0.94 (0.87-1.03)                       | 1.02 (0.91-1.14)                         | 1.00 (0.89-1.28)                                 | 0.96 (0.88-1.04)                                 |
| Insulin type (ref: glargine 100u/mL)               |                                        |                                          |                                                  |                                                  |
| Detemir                                            | 1.14 (0.57-2.26)                       | 1.19 (0.90-1.56)                         | 0.98 (0.71-1.36)                                 | 1.06 (0.86-1.30)                                 |
| NPH                                                | 1.12 (0.66-1.88)                       | 0.70 (0.35-1.39)                         | 1.02 (0.48-2.15)                                 | 0.89 (0.54-1.46)                                 |
| Lispro protamine                                   | 0.77 (0.39-1.55)                       | 0.56 (0.24-1.30)                         | 0.60 (0.24-1.52)                                 | 0.71 (0.38-1.35)                                 |
| Glargine 300u/mL                                   | 1.14 (0.57-2.26)                       | 1.19 (0.90-1.56)                         | 1.25 (0.47-3.32)                                 | 1.05 (0.51-2.18)                                 |
| <i>Patient behavior</i>                            |                                        |                                          |                                                  |                                                  |
| Insulin persistence                                | 1.14 (0.88-1.48)                       | 1.24 (0.90-1.71)                         | 1.02 (0.7-1.46)                                  | 1.21 (0.95-1.54)                                 |
| No. glucose self-testing fills*                    | 1.01 (1.00-1.02)                       | 1.02 (1.00-1.04)                         | 1.02 (1.00-1.04)                                 | 1.01 (1.00-1.02)                                 |
| <i>Model of care and insurance structure:</i>      |                                        |                                          |                                                  |                                                  |
| Endocrinologist use                                | 1.45 (1.16-1.80)                       | 1.26 (0.96-1.66)                         | 1.42 (1.02-1.96)                                 | 1.42 (1.15-1.74)                                 |
| Primary care office visits*                        | 1.01 (1.00-1.01)                       | 0.99 (0.97-1.01)                         | 1.01 (0.99-1.03)                                 | 1.00 (0.99-1.01)                                 |
| Use of insulin on formulary                        | 0.86 (0.47-1.57)                       | 0.67 (0.35-1.27)                         | 0.56 (0.26-1.24)                                 | 0.87 (0.52-1.48)                                 |
| Insulin copayment*                                 | 1.00 (1.00-1.00)                       | 1.00 (1.00-1.00)                         | 1.00 (0.99-1.00)                                 | 1.00 (0.99-1.00)                                 |
| Use of mail order                                  | 1.15 (0.91-1.45)                       | 1.39 (1.02-1.90)                         | 1.24 (0.87-1.79)                                 | 1.20 (0.97-1.50)                                 |

\*Per 1-unit increase

Abbreviations: Ref, Referent; CI, Confidence Interval; COPD, chronic obstructive pulmonary disease; NPH, insulin isophane
